# Supplementary material for: Liquid Chromatography Coupled to High-Resolution Mass Spectrometry for the Confirmation of Caribbean Ciguatoxin-1 as the Main Toxin Responsible for Ciguatera Poisoning Caused by Fish from European Atlantic Coasts
Source: PubMed Central journal article supplement (PMC7232264; doi:10.3390/toxins12040267), 2020-04-21
Supplement: toxins-12-00267-s001.pdf [file toxins-12-00267-s001.pdf]

# Supplementary materials: Liquid Chromatography Coupled to High Resolution Mass Spectrometry for the Confirmation of Caribbean Ciguatoxin-1 as the Main Toxin Responsible for Ciguatera Poisoning Caused by Fish from European Atlantic Coasts

Pablo Estevez, Manoella Sibat, José Manuel Leão-Martins, Pedro Reis Costa, Ana Gago-Martínez and Philipp Hess

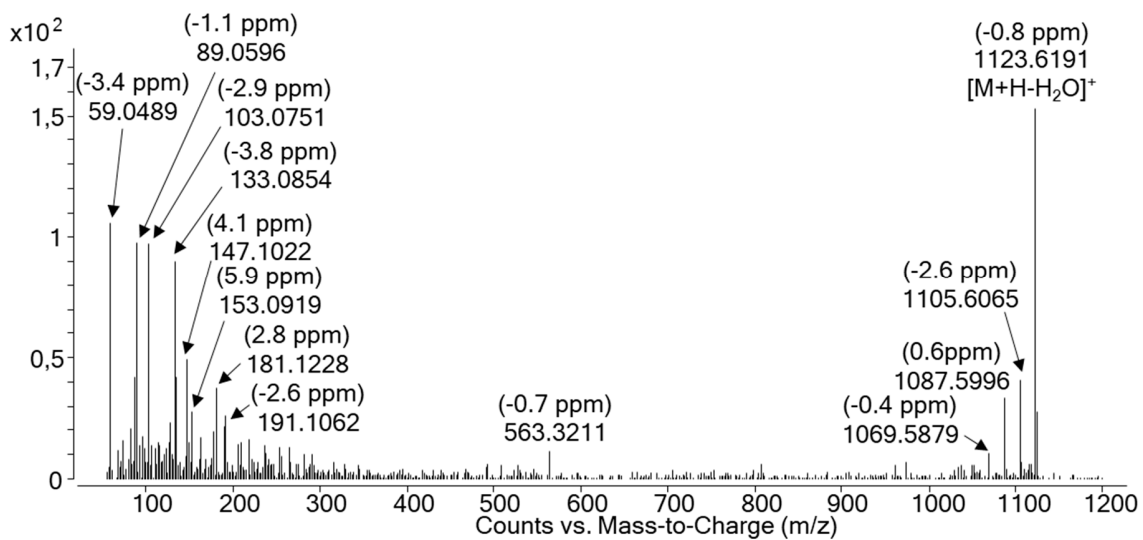

**Figure S1.** ESI<sup>+</sup> Targeted MS/MS spectra of C-CTX1 LRM (123 ng/mL approx.) selecting C-CTX1 m/z 1123.6200 [M+H-H<sub>2</sub>O]<sup>+</sup> at an average collision energy of 20, 40 and 60 eV.

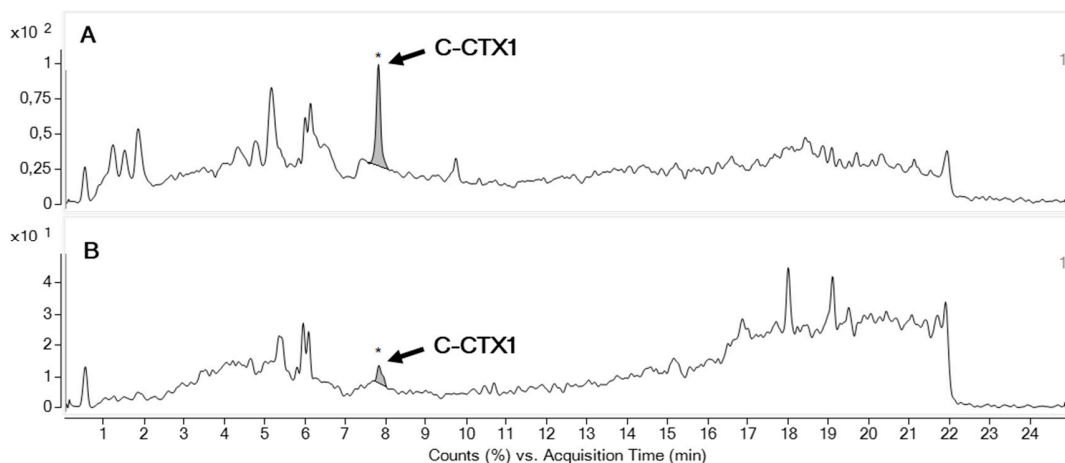

**Figure S2.** LC-HRMS chromatogram of **A**) C-CTX1 LRM (123 ng/mL approx.) at 7.8 min; **B**) C-CTX1 detected at 7.8 min in a naturally contaminated sample of barred hogfish (*Bodianus scrofa*) from Selvagens Islands (Portugal)

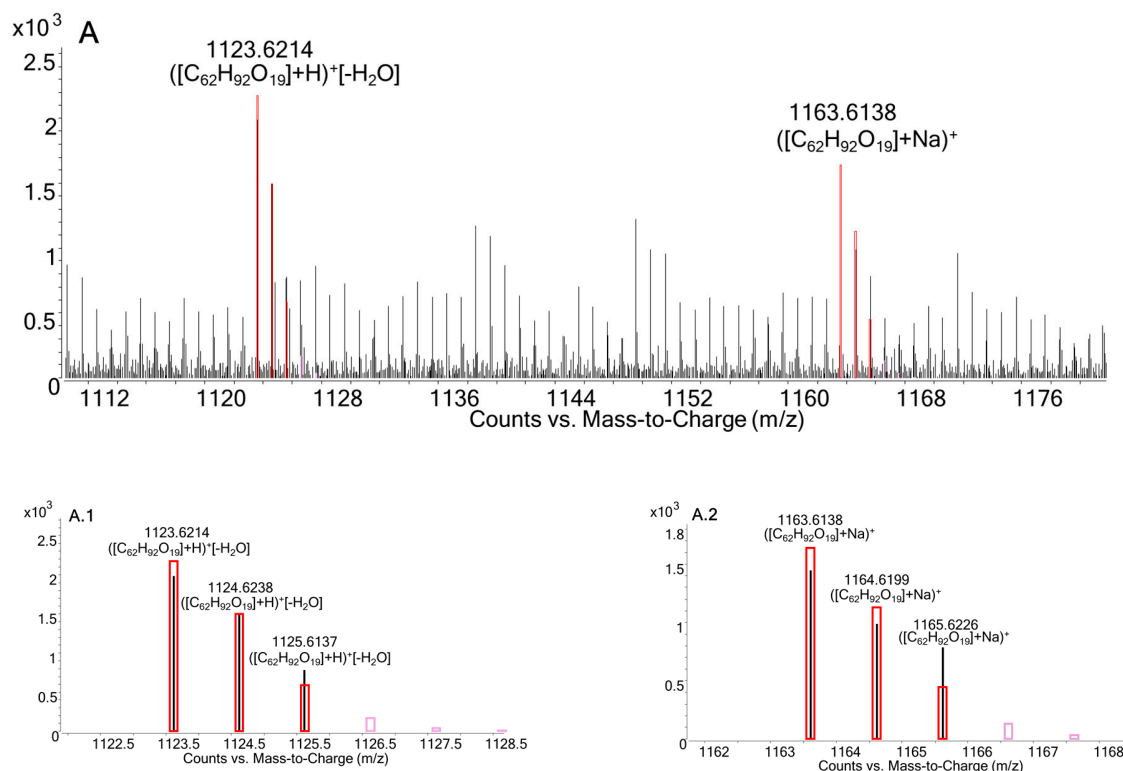

**Figure S3. A)** ESI<sup>+</sup> Full scan MS spectra of Barred hogfish (*Bodianus scrofa*) from Selvagens Islands (Portugal); **A.1)** Zoom of C-CTX1  $m/z$  1123.6214  $[M+H-H_2O]^+$ ; **A.2)** Zoom of C-CTX1  $m/z$  1163.6138  $[M+Na]^+$

**Table S1.** Accurate mono-isotopic masses (theoretical and measured) of C-CTX1 after ESI<sup>+</sup> Targeted MS/MS analysis selecting  $[M+H-(H_2O)]^+$  at  $m/z$  1123.6200 with an averaged collision energy of 20, 40 and 60 eV (A) and 30, 50 and 70 eV (B).

| Ion             | Molecular Formula      | Theoretical $m/z$ | A              |             | B              |             |
|-----------------|------------------------|-------------------|----------------|-------------|----------------|-------------|
|                 |                        |                   | Measured $m/z$ | Error (ppm) | Measured $m/z$ | Error (ppm) |
| $[M+H-H_2O]^+$  | $C_{62}H_{91}O_{18}^+$ | 1123.6200         | 1123.6191      | -0.8        | 1123.6158      | -3.7        |
| $[M+H-2H_2O]^+$ | $C_{62}H_{89}O_{17}^+$ | 1105.6094         | 1105.6065      | -2.6        | 1105.6063      | -2.8        |
| $[M+H-3H_2O]^+$ | $C_{62}H_{87}O_{16}^+$ | 1087.5989         | 1087.5996      | 0.6         | 1087.5933      | -5.1        |
| $[M+H-4H_2O]^+$ | $C_{62}H_{85}O_{15}^+$ | 1069.5883         | 1069.5879      | -0.4        | 1069.5865      | -1.7        |
|                 | $C_{31}H_{47}O_9^+$    | 563.3215          | 563.3211       | -0.7        | n.d.           | n.d.        |
|                 | $C_{31}H_{45}O_8^+$    | 545.3109          | n.d.           | n.d.        | 545.3072       | -6.8        |
|                 | $C_{31}H_{43}O_7^+$    | 527.3003          | n.d.           | n.d.        | 527.2953       | -9.5        |
|                 | $C_{31}H_{41}O_6^+$    | 509.2898          | n.d.           | n.d.        | 509.2873       | -4.9        |
|                 | $C_{14}H_{21}O_4^+$    | 253.1434          | n.d.           | n.d.        | 253.1431       | -1.2        |
|                 | $C_{14}H_{19}O_3^+$    | 235.1329          | n.d.           | n.d.        | 235.1334       | 2.1         |
|                 | $C_{12}H_{17}O_3^+$    | 209.1172          | n.d.           | n.d.        | 209.1173       | 0.5         |
|                 | $C_{12}H_{15}O_2^+$    | 191.1067          | 191.1062       | -2.6        | 191.1066       | -0.5        |
|                 | $C_{11}H_{17}O_2^+$    | 181.1223          | 181.1228       | 2.8         | 181.1224       | 0.6         |
|                 | $C_9H_{13}O_2^+$       | 153.0910          | 153.0919       | 5.9         | n.d.           | n.d.        |
|                 | $C_7H_{15}O_3^+$       | 147.1016          | 147.1022       | 4.1         | 147.1011       | -3.4        |
|                 | $C_6H_{13}O_3^+$       | 133.0859          | 133.0854       | -3.8        | 133.0856       | -2.3        |
|                 | $C_5H_{11}O_2^+$       | 103.0754          | 103.0751       | -2.9        | 103.0751       | -2.9        |
|                 | $C_4H_9O_2^+$          | 89.0597           | 89.0596        | -1.1        | 89.0595        | -2.2        |
|                 | $C_3H_7O^+$            | 59.0491           | 59.0489        | -3.4        | 59.0487        | -6.8        |
